# Supplementary material
Source: Research Square preprint supplement (doi:10.21203/rs.3.rs-10133055/v1)
Supplement: Supplementary file 1 [file dcf04120e3837fe050bf2732.xlsx]

## Sheet: Full_table (to the manuscript)
Soil property	Depth	Forest type	mean	SD	q25	q75	mean difference (native-invaded)	Pr (>0)	Pr(<0)
Carbon	0-10	native	4.10128	0.155117	3.80235	4.39849	-0.08479	0.33	0.67
		invaded	4.18608	0.114301	3.96577	4.41071
	11-30	native	2.66534	0.149494	2.37489	2.95536	-0.120374	0.26	0.74
		invaded	2.78571	0.109734	2.57637	3.0016
	31-50	native	1.61659	0.140593	1.34478	1.8879	-0.19148	0.13	0.87
		invaded	1.80807	0.100887	1.6137	2.006
Nitrogen	0-10	native	0.398922	0.0342623	0.336317	0.470934	-0.026985	0.26	0.74
		invaded	0.425907	0.0274704	0.374919	0.482754
	11-30	native	0.255684	0.0249629	0.209835	0.30759	0.01625	0.3	0.71
		invaded	0.271935	0.0197372	0.235374	0.312029
	31-50	native	0.157402	0.0188792	0.122978	0.195966	-0.018699	0.66	0.35
		invaded	0.176101	0.0147132	0.14907	0.206079
Phosporus	0-10	native	36.1604	4.58134	28.1945	46.0686	2.599	0.68	0.32
		invaded	33.5616	3.35722	27.6071	40.6416
	11-30	native	22.4392	2.94283	17.3323	28.7604	-10.92	0.01	0.99
		invaded	33.3595	3.31076	27.49	40.3571
	31-50	native	6.83868	1.28067	4.64908	9.5956	-21.55	0	1.00
		invaded	28.3857	2.86012	23.3048	34.4131
Calcium	0-10	native	16.4574	1.65368	13.5001	19.9099	0.3366	0.56	0.44
		invaded	16.1208	1.27359	13.7793	18.7443
	11-30	native	11.9646	1.21123	9.81533	14.5167	-0.8943	0.28	0.72
		invaded	12.8589	1.01916	10.9869	14.9627
	31-50	native	11.2413	1.14902	9.18668	13.6583	0.5755	0.66	0.35
		invaded	10.6658	0.848704	9.11283	12.42
Magnesium	0-10	native	4.63912	0.629047	3.54979	6.00471	0.7276	0.84	0.16
		invaded	3.91154	0.415873	3.16727	4.77584
	11-30	native	4.86309	0.655505	3.72723	6.27328	1.4794	0.98	0.02
		invaded	3.3837	0.36045	2.73472	4.13157
	31-50	native	4.41056	0.602757	3.3641	5.70813	1.2494	0.98	0.03
		invaded	3.16117	0.338611	2.55659	3.87295
Potassium	0-10	native	0.786858	0.0950854	0.617473	0.988334	0.2018	0.97	0.03
		invaded	0.585071	0.0585479	0.478722	0.70793
	11-30	native	0.846281	0.100566	0.667996	1.05961	0.2031	0.96	0.04
		invaded	0.643215	0.062786	0.530736	0.773612
	31-50	native	0.953719	0.116001	0.74865	1.20018	0.40096	1	0
		invaded	0.552761	0.0551034	0.453081	0.666517
Sodium	0-10	native	0.786858	0.0950854	0.617473	0.988334	0.07919	0.99	0.01
		invaded	0.585071	0.0585479	0.478722	0.70793
	11-30	native	0.846281	0.100566	0.667996	1.05961	0.10099	1	0
		invaded	0.643215	0.062786	0.530736	0.773612
	31-50	native	0.953719	0.116001	0.74865	1.20018	0.10722	1	0
		invaded	0.552761	0.0551034	0.453081	0.666517
Bulk density	0-10	native	0.751239	0.0198376	0.713735	0.791363	-0.05466	0.02	0.98
		invaded	0.805895	0.0166187	0.774153	0.839596
	11-30	native	0.931503	0.0242818	0.885456	0.980892	-0.04195	0.08	0.92
		invaded	0.973452	0.019919	0.935374	1.01368
	31-50	native	0.98929	0.0259512	0.939518	1.04162	-0.0202151	0.25	0.75
		invaded	1.0095	0.0205898	0.970281	1.05163
pH	0-10	native	6.81467	0.0627574	6.69151	6.94124	-0.06259	0.2	0.8
		invaded	6.87726	0.0499025	6.78038	6.97656
	11-30	native	6.89633	0.0636037	6.77252	7.02318	0.06396	0.8	0.2
		invaded	6.83237	0.0496889	6.73604	6.93114
	31-50	native	6.91723	0.064475	6.79211	7.047	0.044263	0.72	0.28
		invaded	6.87296	0.0497899	6.77657	6.97279
Cation exchange capacity	0-10	native	26.0846	2.02148	22.4287	30.359	0.9421	0.65	0.35
		invaded	25.1425	1.53939	22.2996	28.3559
	11-30	native	21.8006	1.69035	18.7372	25.388	0.1612	0.53	0.48
		invaded	21.6394	1.32545	19.1868	24.3916
	31-50	native	19.8975	1.55692	17.06	23.1735	0.01861	0.5	0.5
		invaded	19.8789	1.22219	17.6206	22.4291
